# Supplementary material for: Synthesis of Nanoscale Liposomes via Low-Cost Microfluidic Systems
Source: PubMed Central journal article supplement (PMC7760644; doi:10.3390/mi11121050), 2020-11-28
Supplement: micromachines-11-01050-s001.pdf [file micromachines-11-01050-s001.pdf]

## Supplementary Materials

# Synthesis of Nanoscale Liposomes via Low-Cost Microfluidic Systems

Andrés Aranguren <sup>1,†</sup>, Carlos E. Torres <sup>2,†</sup>, Carolina Muñoz-Camargo <sup>2</sup>, Johann F. Osma <sup>1,\*</sup> and Juan C. Cruz <sup>2,3,\*</sup>

<sup>1</sup> Department of Electrical and Electronic Engineering, Universidad de los Andes, Cra. 1E No. 19a-40, Bogotá DC 111711, Colombia; a.aranguren@uniandes.edu.co

<sup>2</sup> Department of Biomedical Engineering, Universidad de los Andes, Cra. 1E No. 19a-40, Bogotá DC 111711, Colombia; ce.torres10@uniandes.edu.co (C.E.T.); c.munoz2016@uniandes.edu.co (C.M.-C.)

<sup>3</sup> School of Chemical Engineering and Advanced Materials, The University of Adelaide, South Australia 5005, Australia

\* Correspondence: jf.osma43@uniandes.edu.co (J.F.O.); jc.cruz@uniandes.edu.co (J.C.C.)

† These authors contributed equally.

### SI1. Dynamic light scattering (DLS) measurements of liposomes samples synthesized by the microfluidic system proposed

Each experiment was performed in triplicate ( $n = 3$ ) and the analyses for liposome characterization were also performed in triplicate. This is indicated as the labeled replicas in Figure S1 and Figure S2

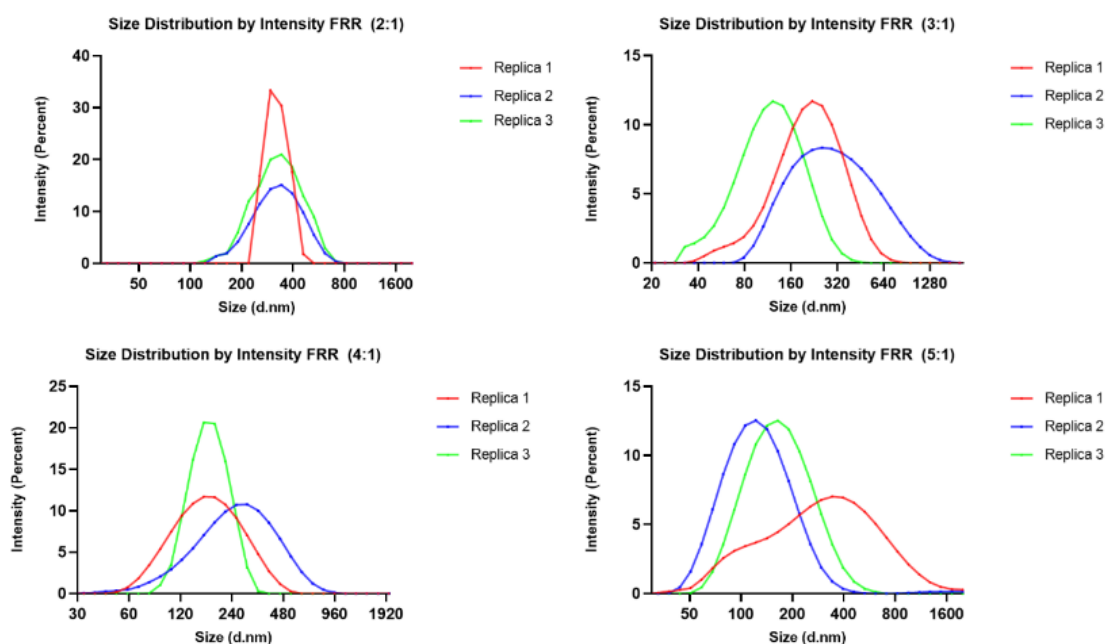

(a)

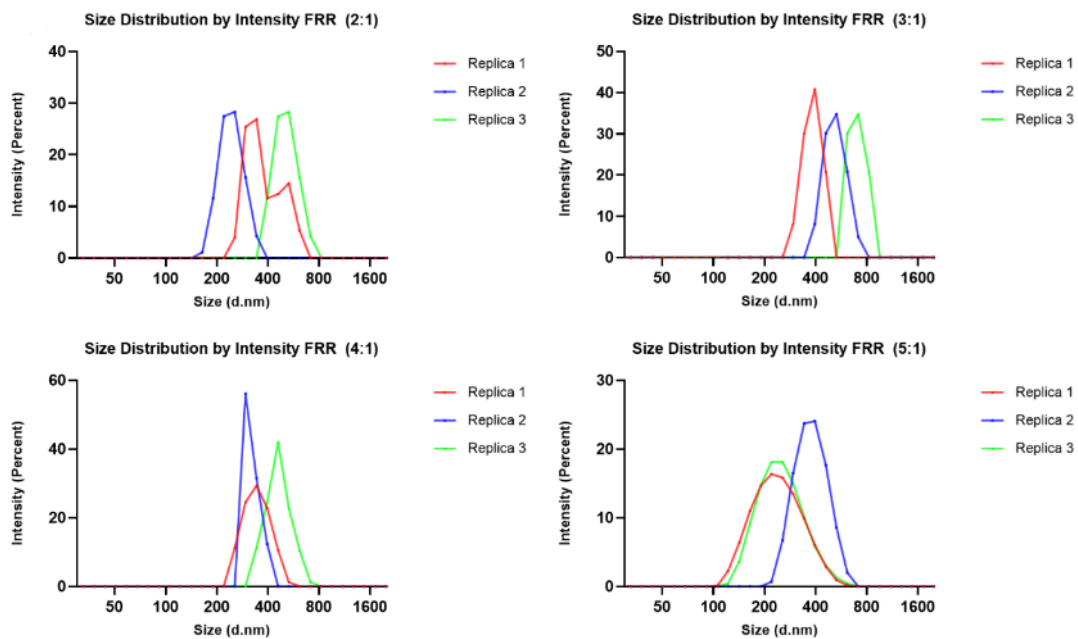

(b)

**Figure S1.** DLS measurements of liposomes samples synthesized by changing the flow rate ratio (FRR) between aqueous and solvent phase using the two-layer microfluidic device; (a) Two-layer device with PBS as aqueous phase; (b) Two-layer device with NaCl solution (0.05 M) as aqueous phase.

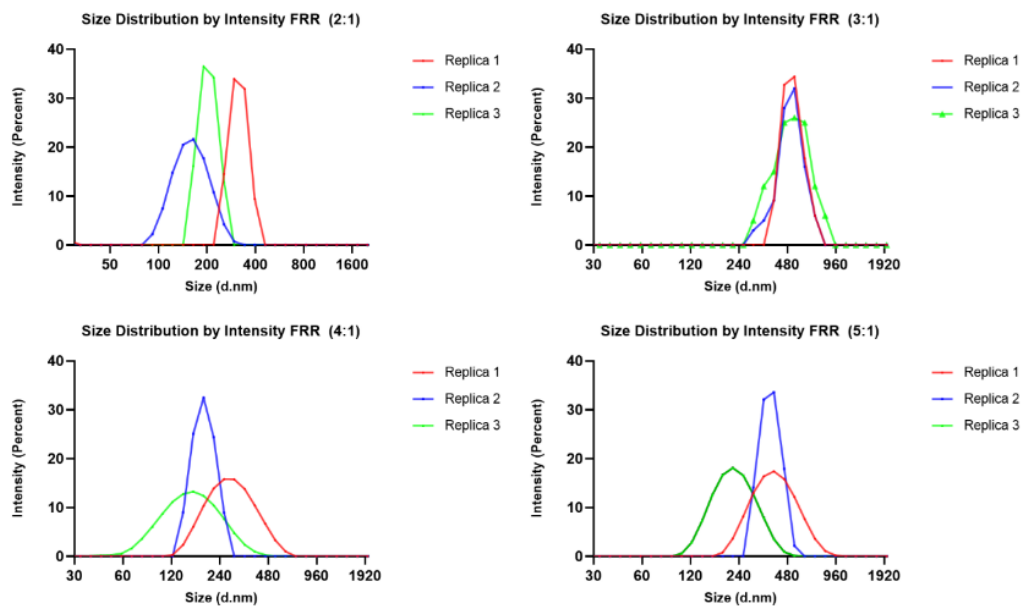

(a)

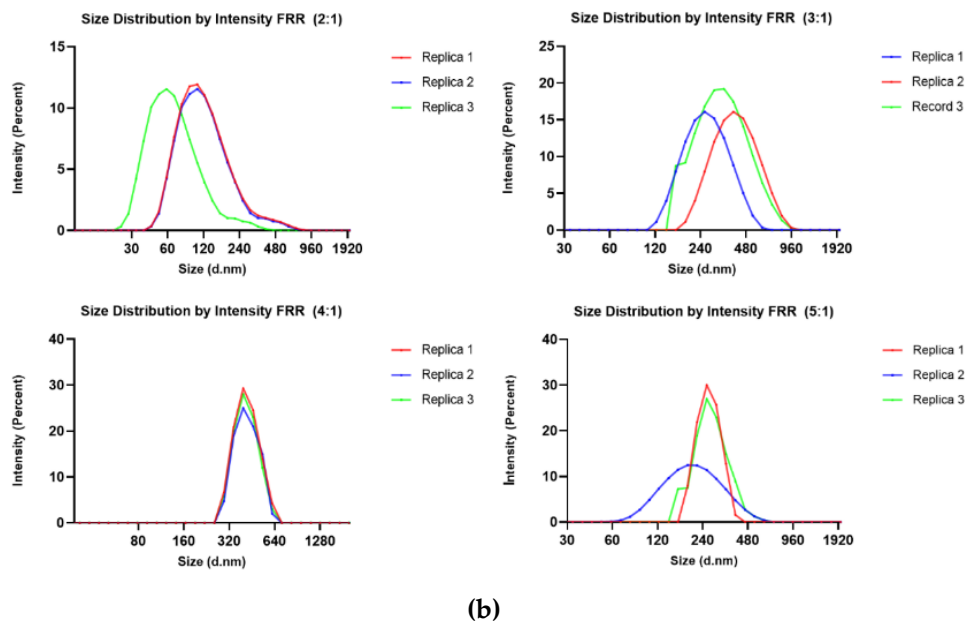

**Figure S2.** DLS measurements of liposomes samples synthesized by changing the flow rate ratio (FRR) between aqueous and solvent phase using the three-layer microfluidic device. A. Three-layer device with PBS solution as aqueous phase. B. Three-layer device with NaCl solution (0.05 M) as aqueous phase.

### SI2. Dynamic light scattering (DLS) measurements of liposomes samples synthesized by the traditional methods

Each experiment was performed in triplicate ( $n = 3$ ) and the analyses for liposome characterization were also performed in triplicate.

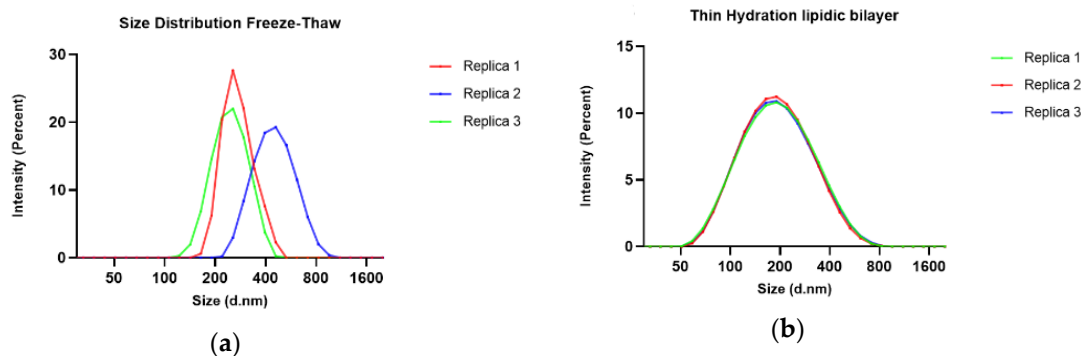

**Figure S3.** DLS measurements. A. Freeze thaw method. B. Thin Hydration bilayer method.

### SI3. Parameters used in the simulations implemented in COMSOL Multiphysics®

The table S1 summarizes the parameters used in the Laminar flow and the transport of diluted species physics.

**Table S1.** Parameters of FEM simulation

| Parameter      | Value   | Units             |
|----------------|---------|-------------------|
| $\mu_{Water}$  | 1.00E-3 | Pa.s              |
| $\rho_{Water}$ | 997     | kg/m <sup>3</sup> |
| $\mu_{IPA}$    | 2.38E-3 | Pa.s              |
| $\rho_{IPA}$   | 783     | kg/m <sup>3</sup> |
| $D_{LP}$       | 1.64E-9 | m <sup>2</sup> /s |

---

|          |        |                    |
|----------|--------|--------------------|
| $C_{LP}$ | 1.73E6 | mol/m <sup>3</sup> |
|----------|--------|--------------------|

---

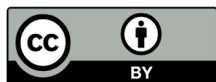

© 2020 by the authors. Licensee MDPI, Basel, Switzerland. This article is an open access article distributed under the terms and conditions of the Creative Commons Attribution (CC BY) license (<http://creativecommons.org/licenses/by/4.0/>).
